# Supplementary figures and images for: Development of robust proton exchange membranes using a sPVA–silica composite with different crosslinkers and evaluation of their fuel cell performance
Source: Royal Society of Chemistry journal article supplement (doi:10.1039/d3nj04641a), 2024-01-01

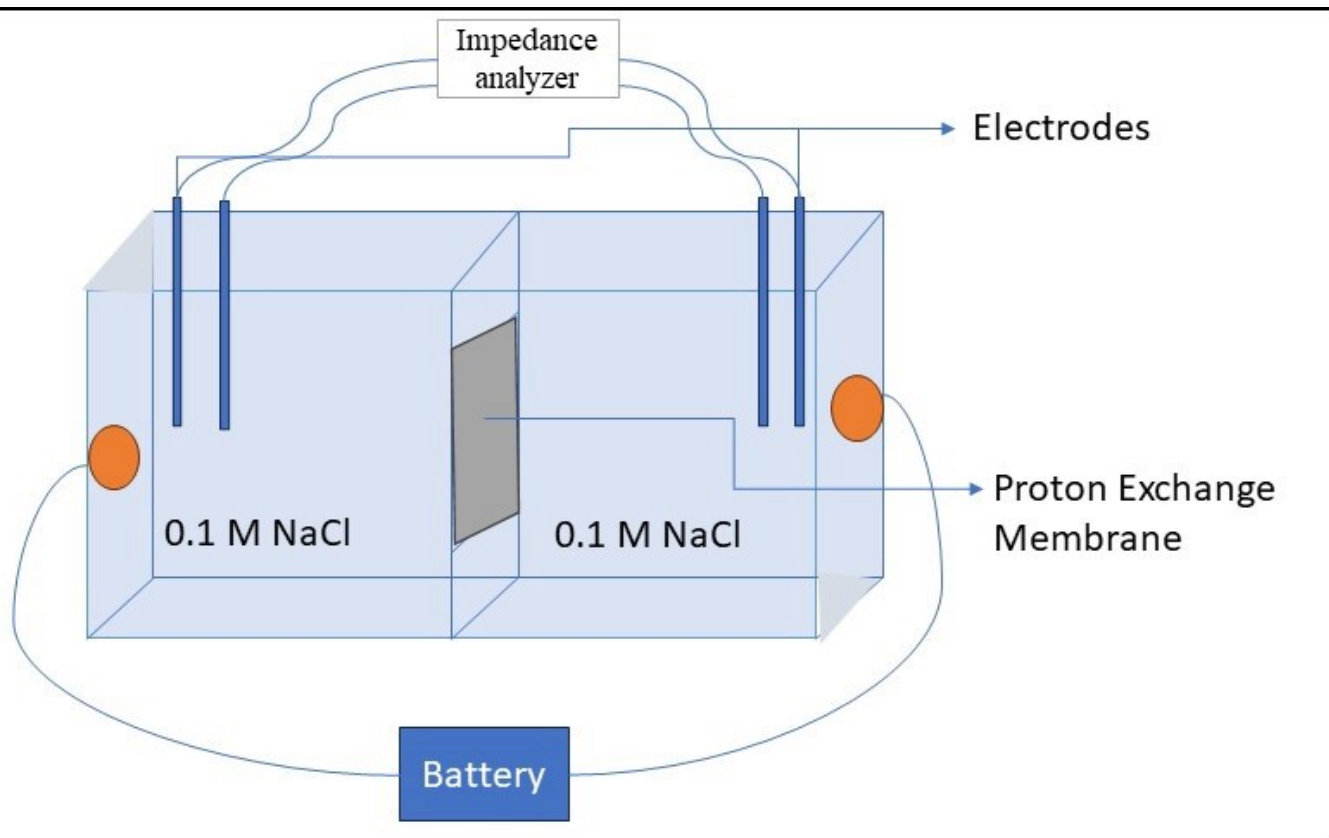

Supplement: d3nj04641a2.pdf [file d3nj04641a2.pdf]

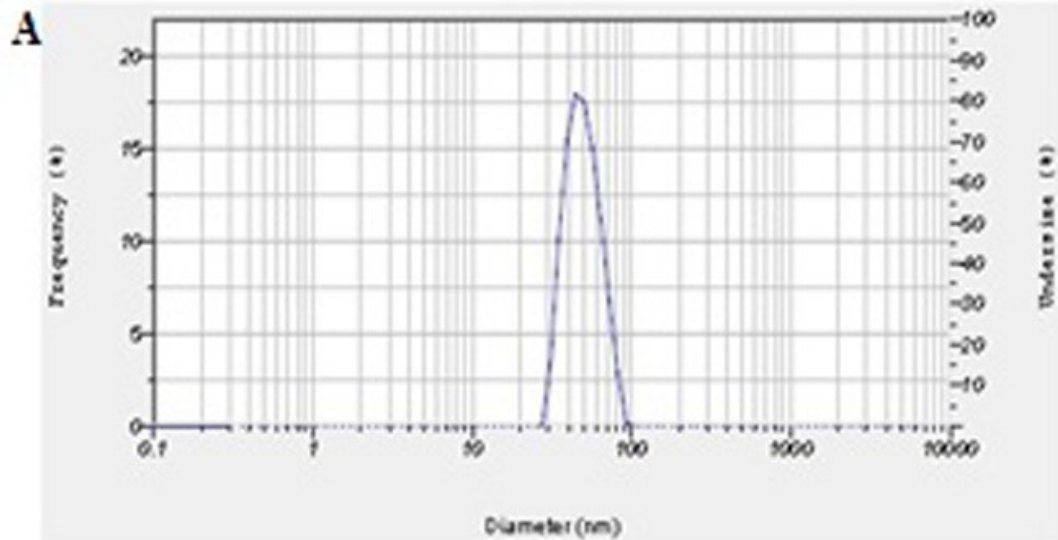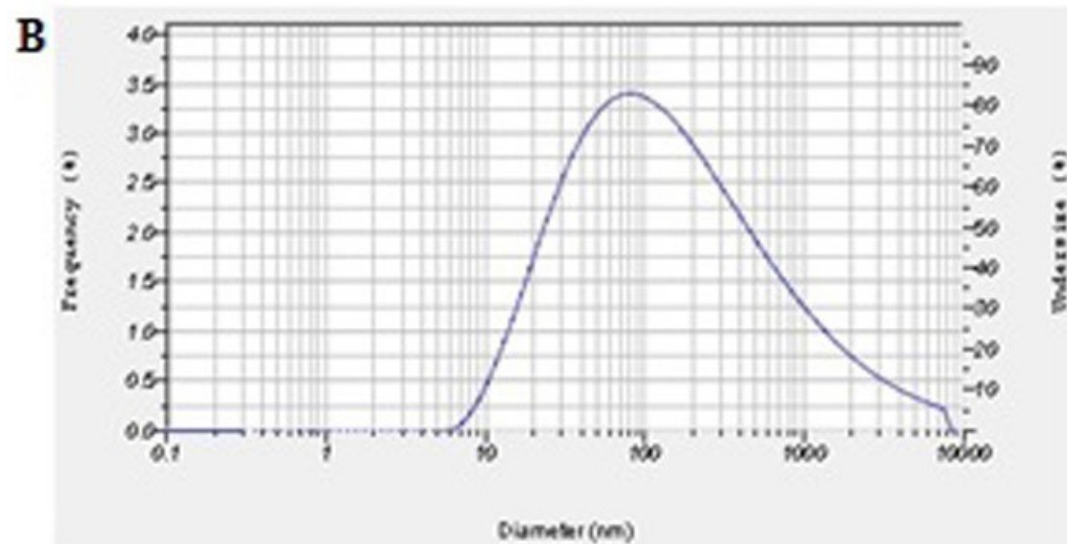

Supplement: d3nj04641a3.pdf [file d3nj04641a3.pdf]

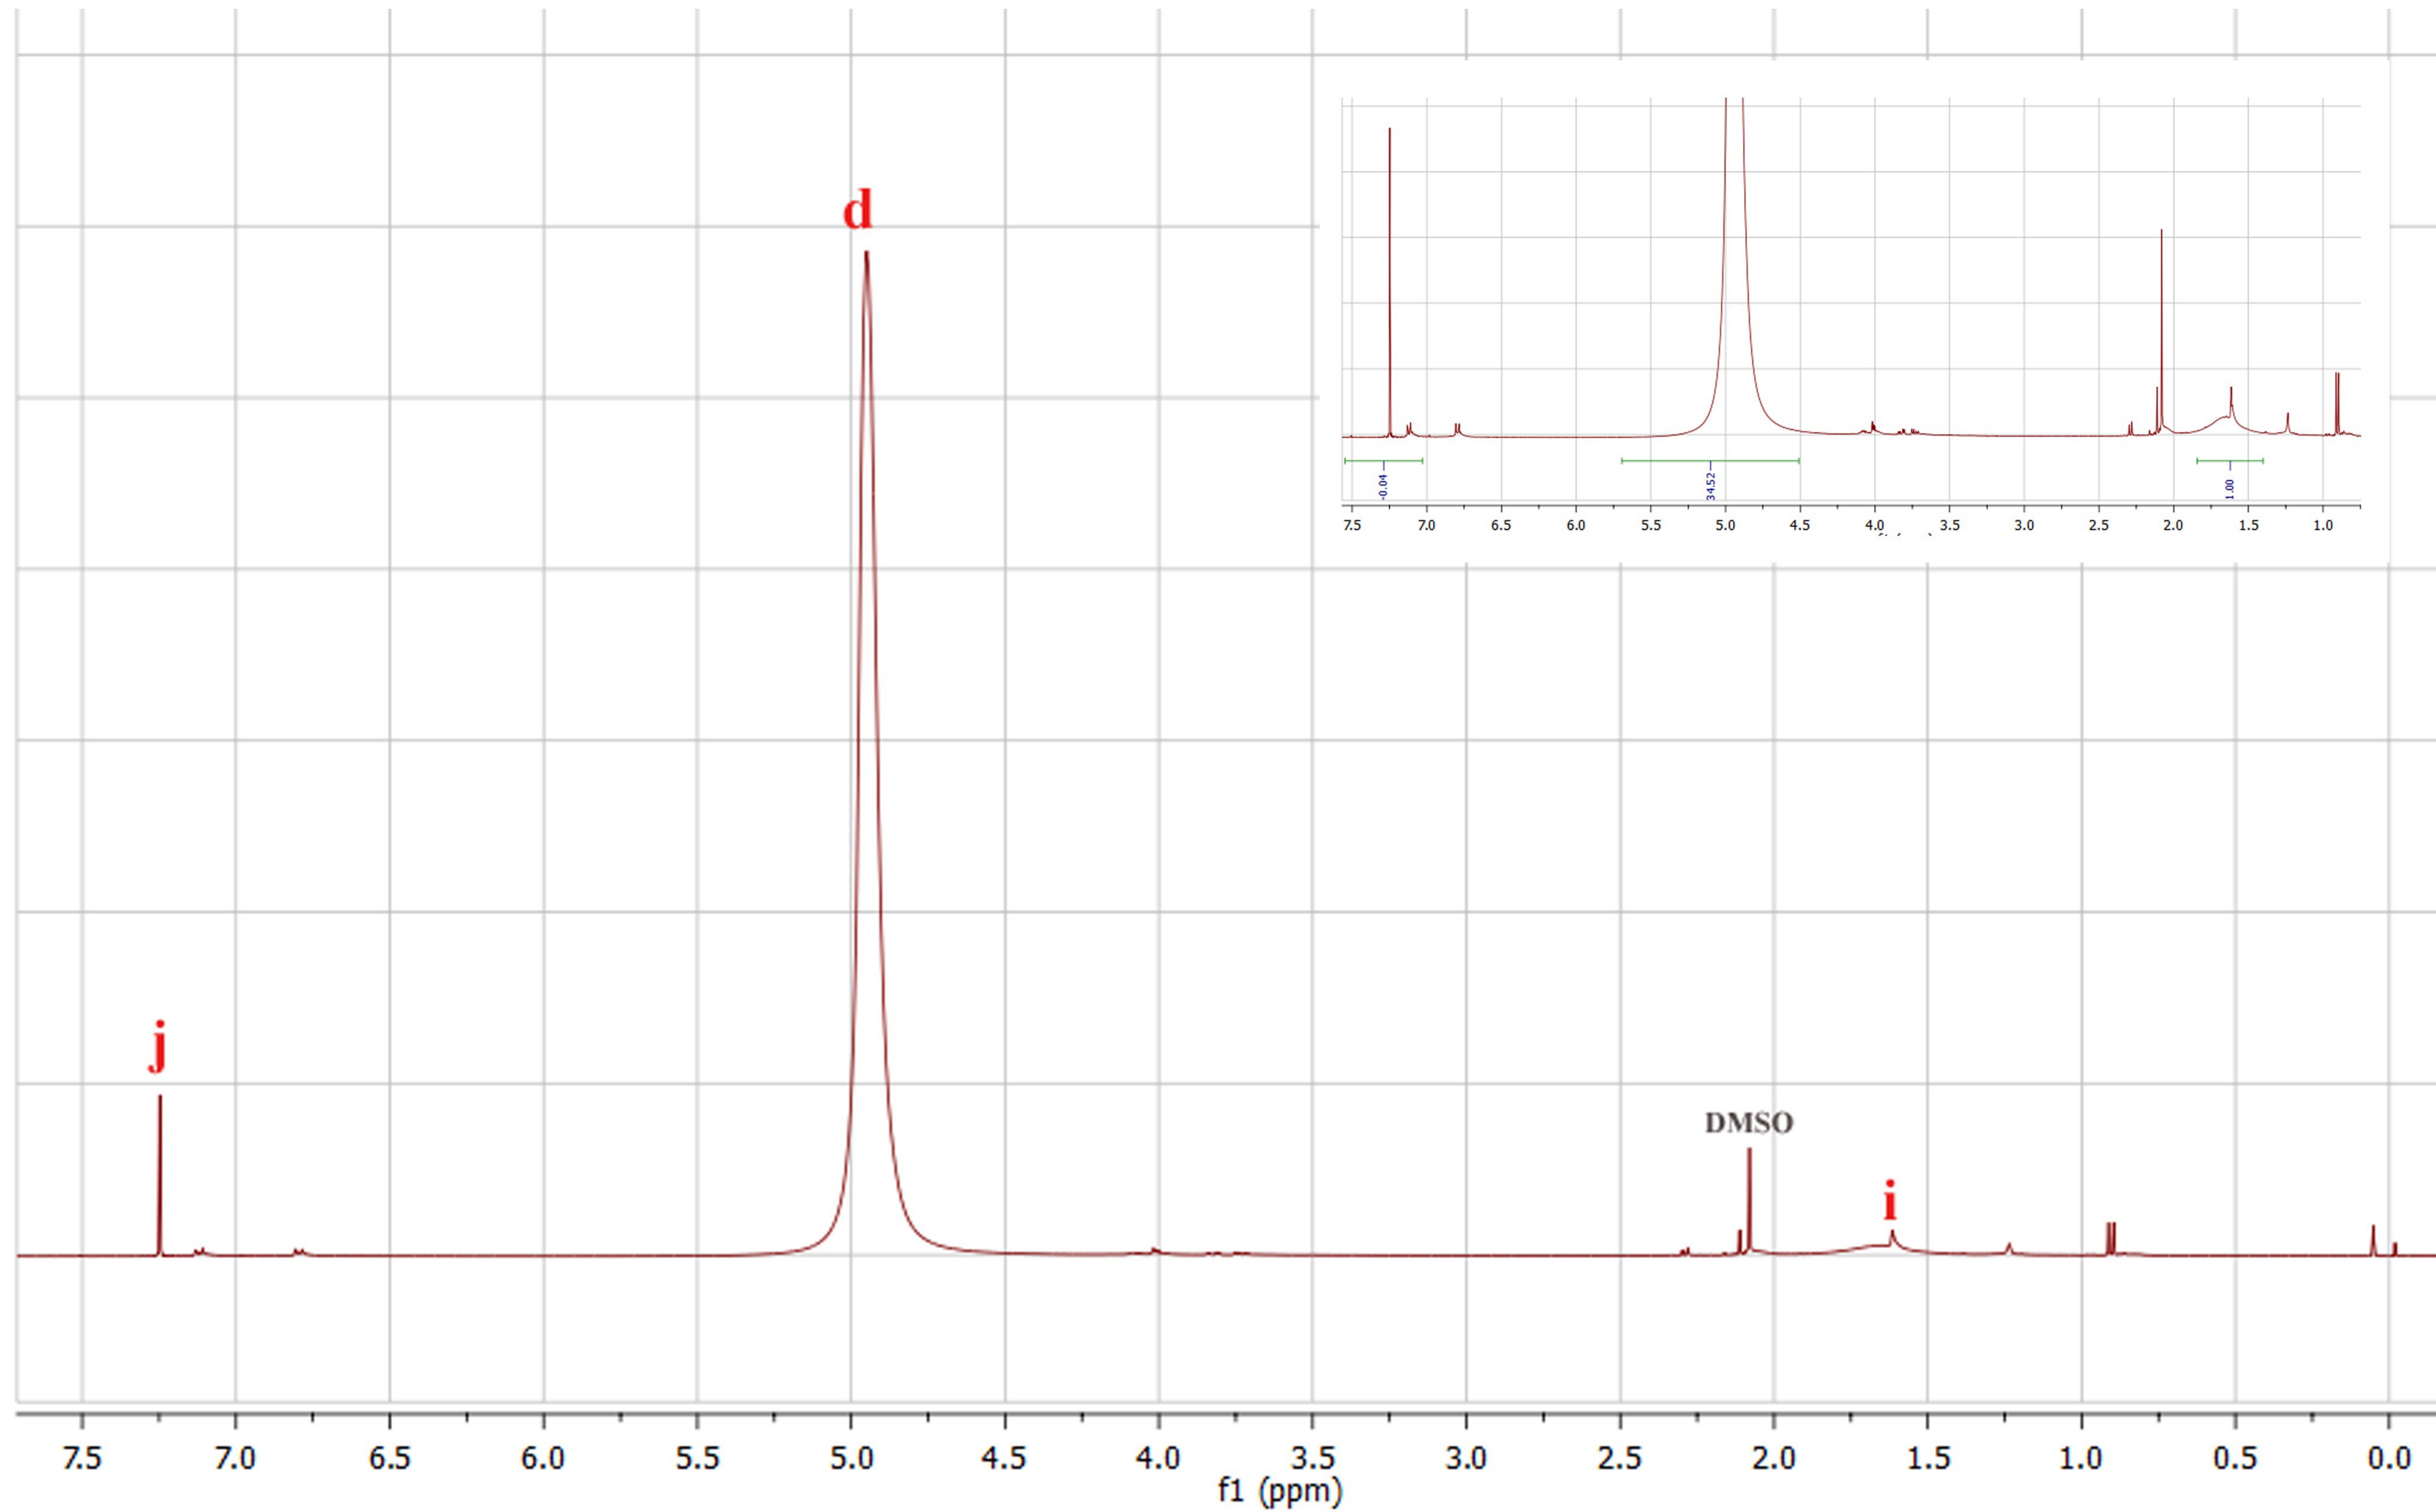

Supplement: d3nj04641a4.pdf [file d3nj04641a4.pdf]

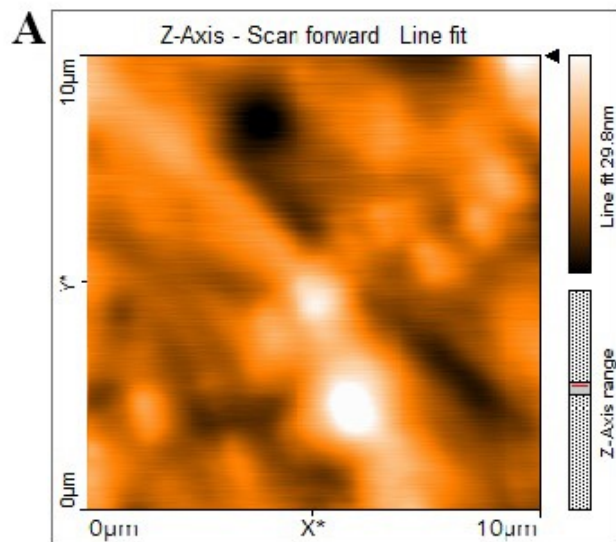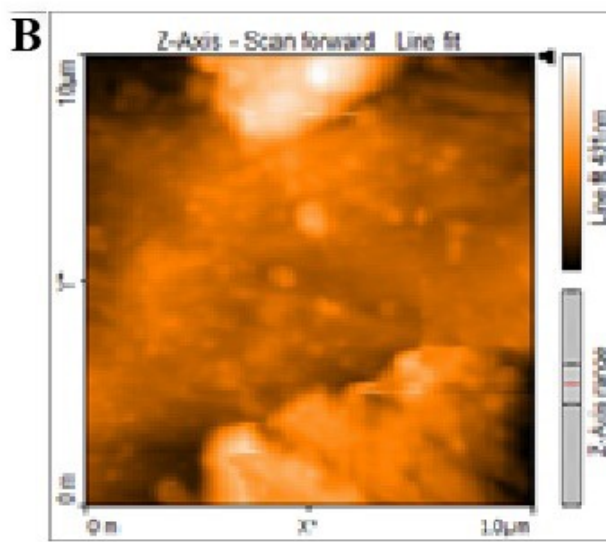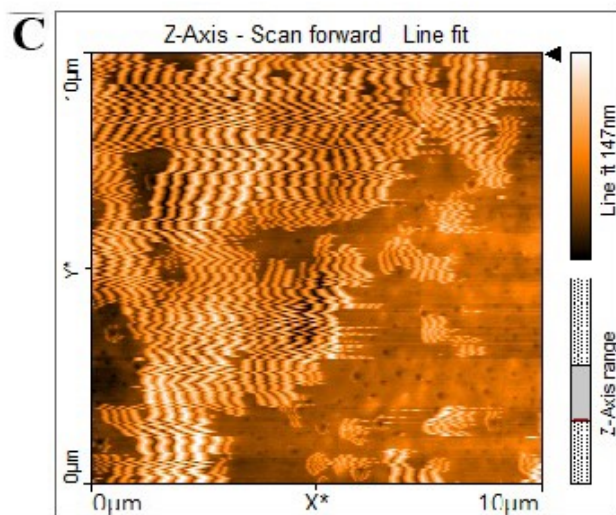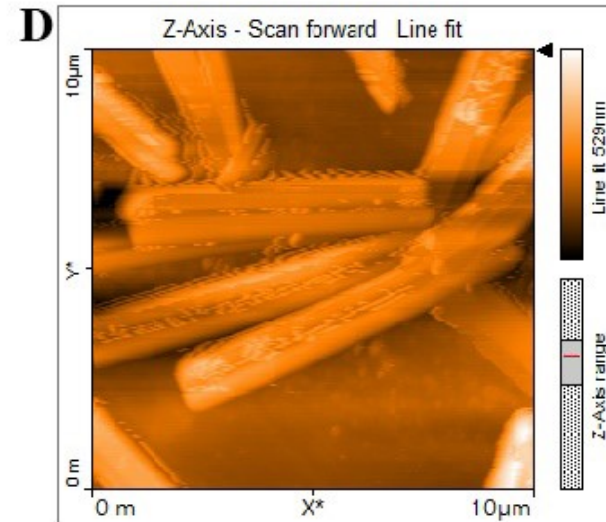

Supplement: d3nj04641a5.pdf [file d3nj04641a5.pdf]

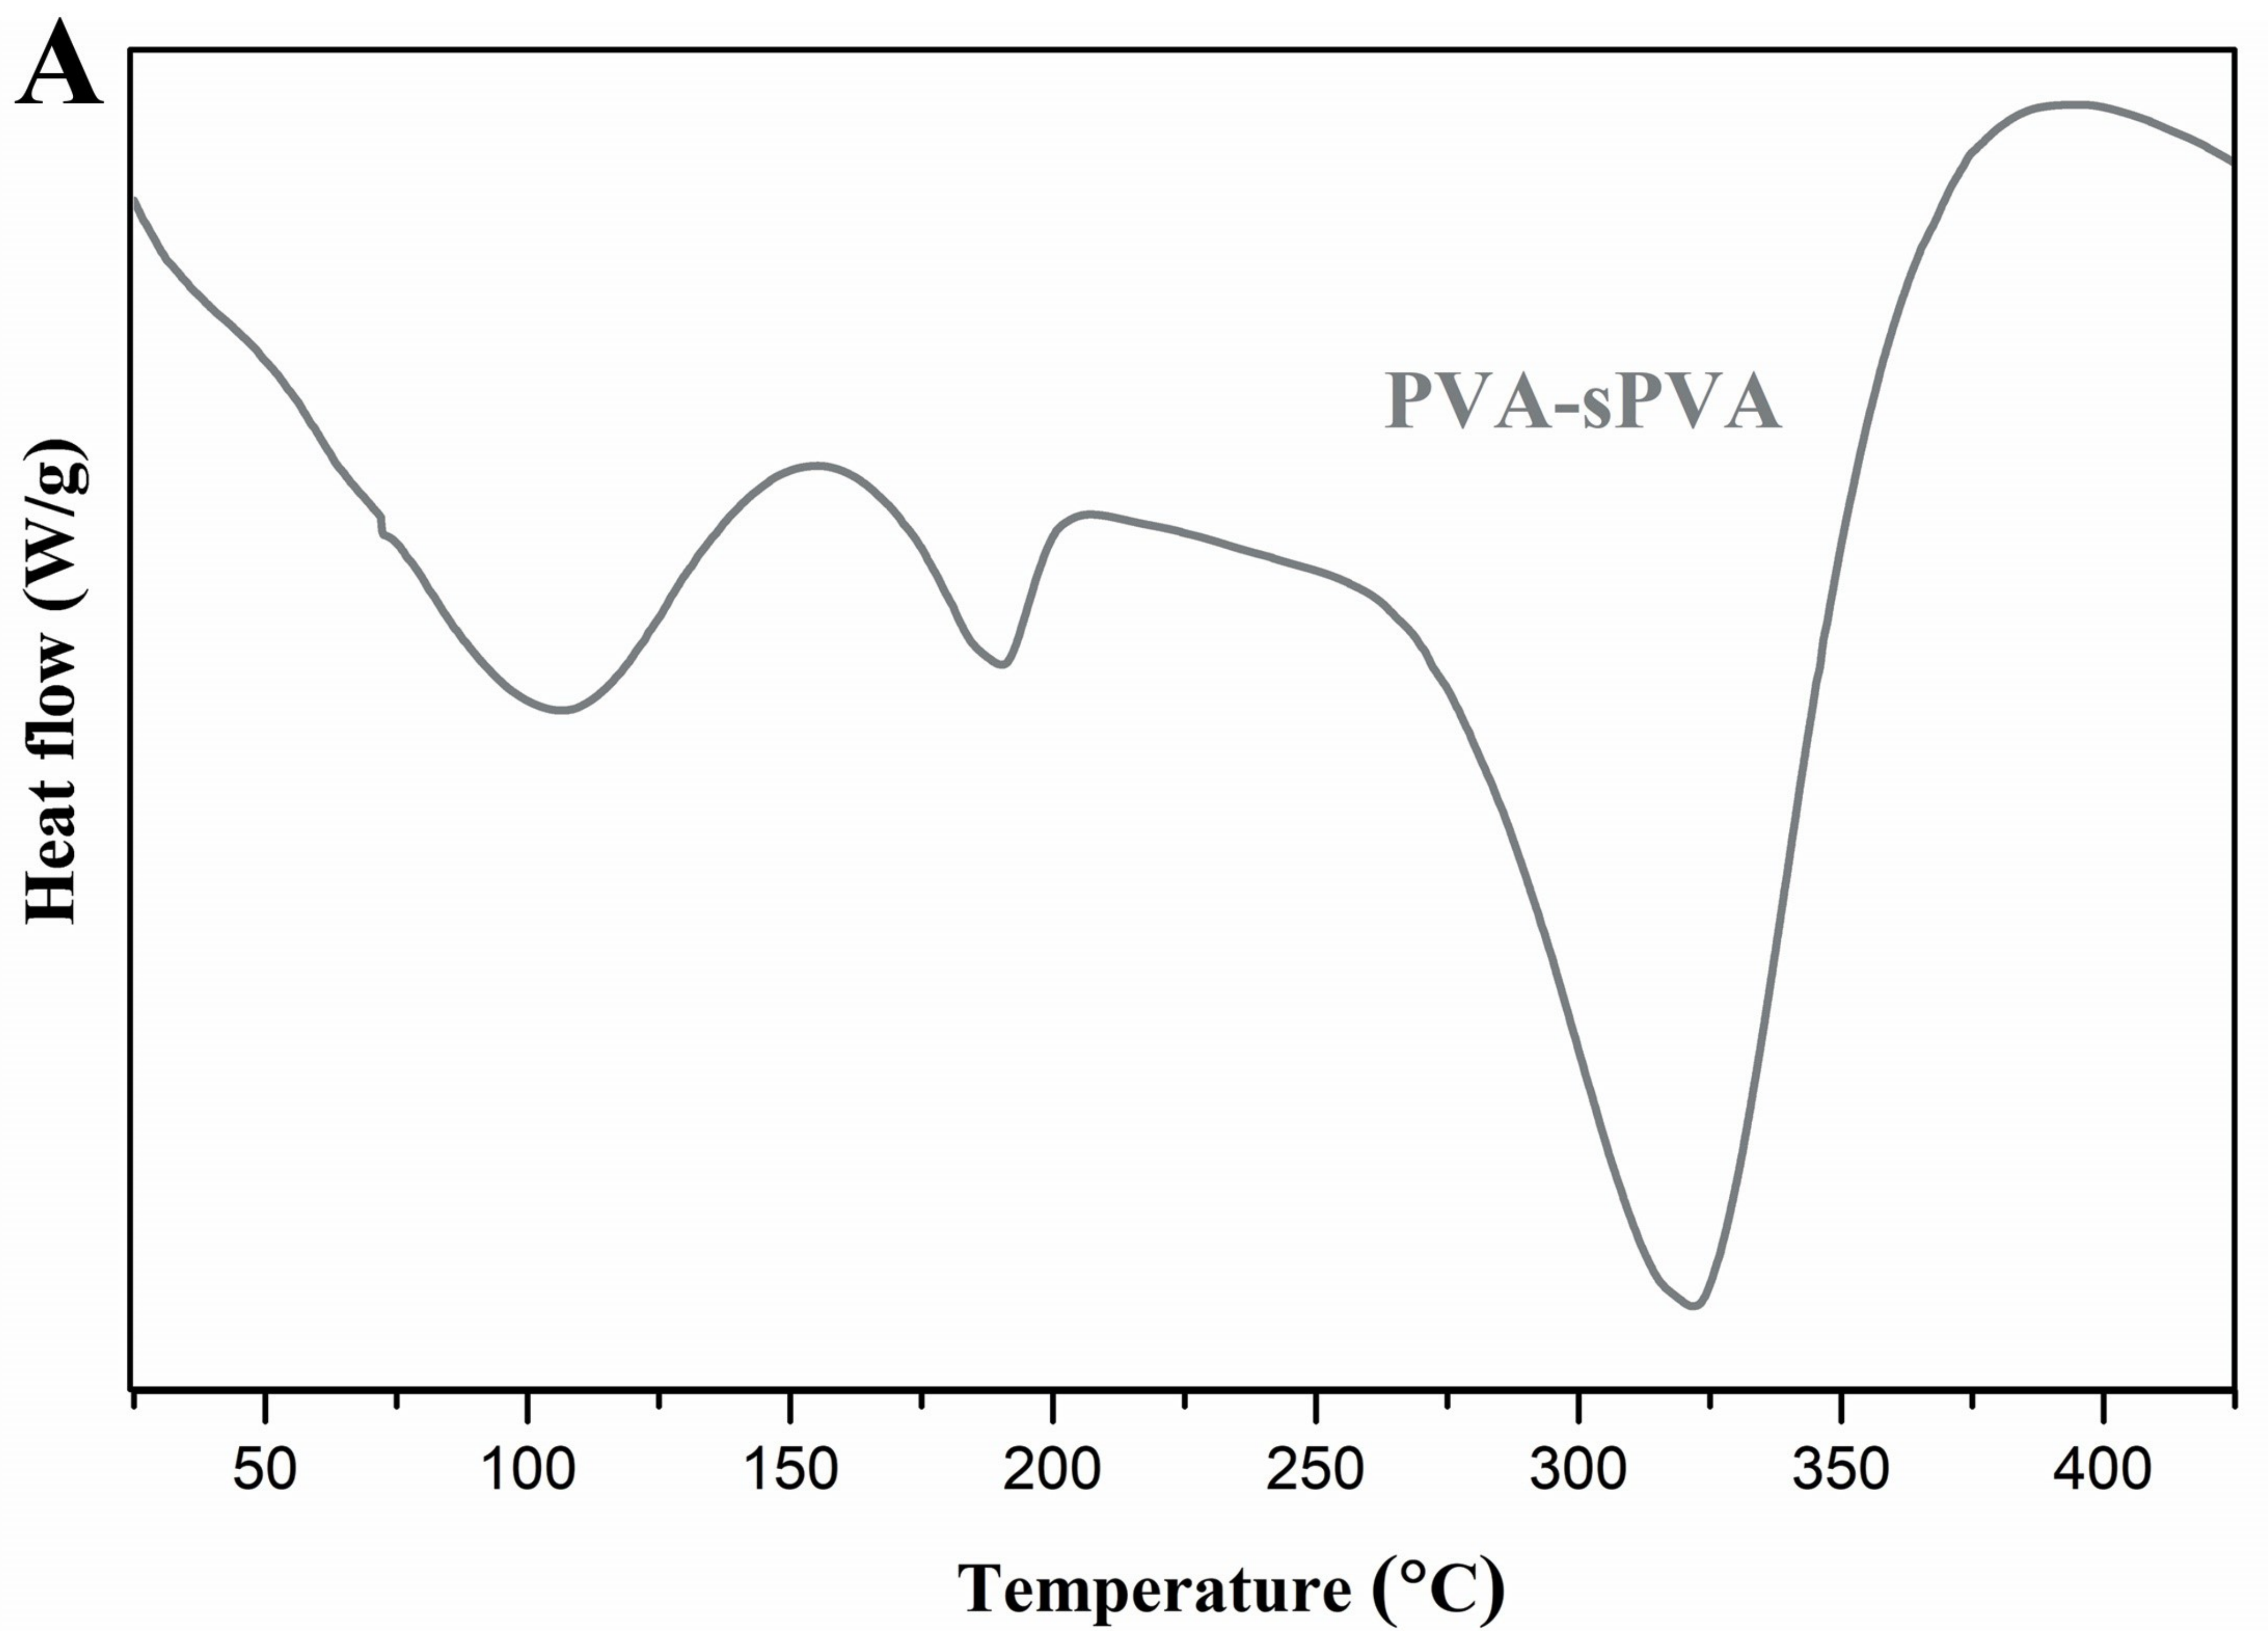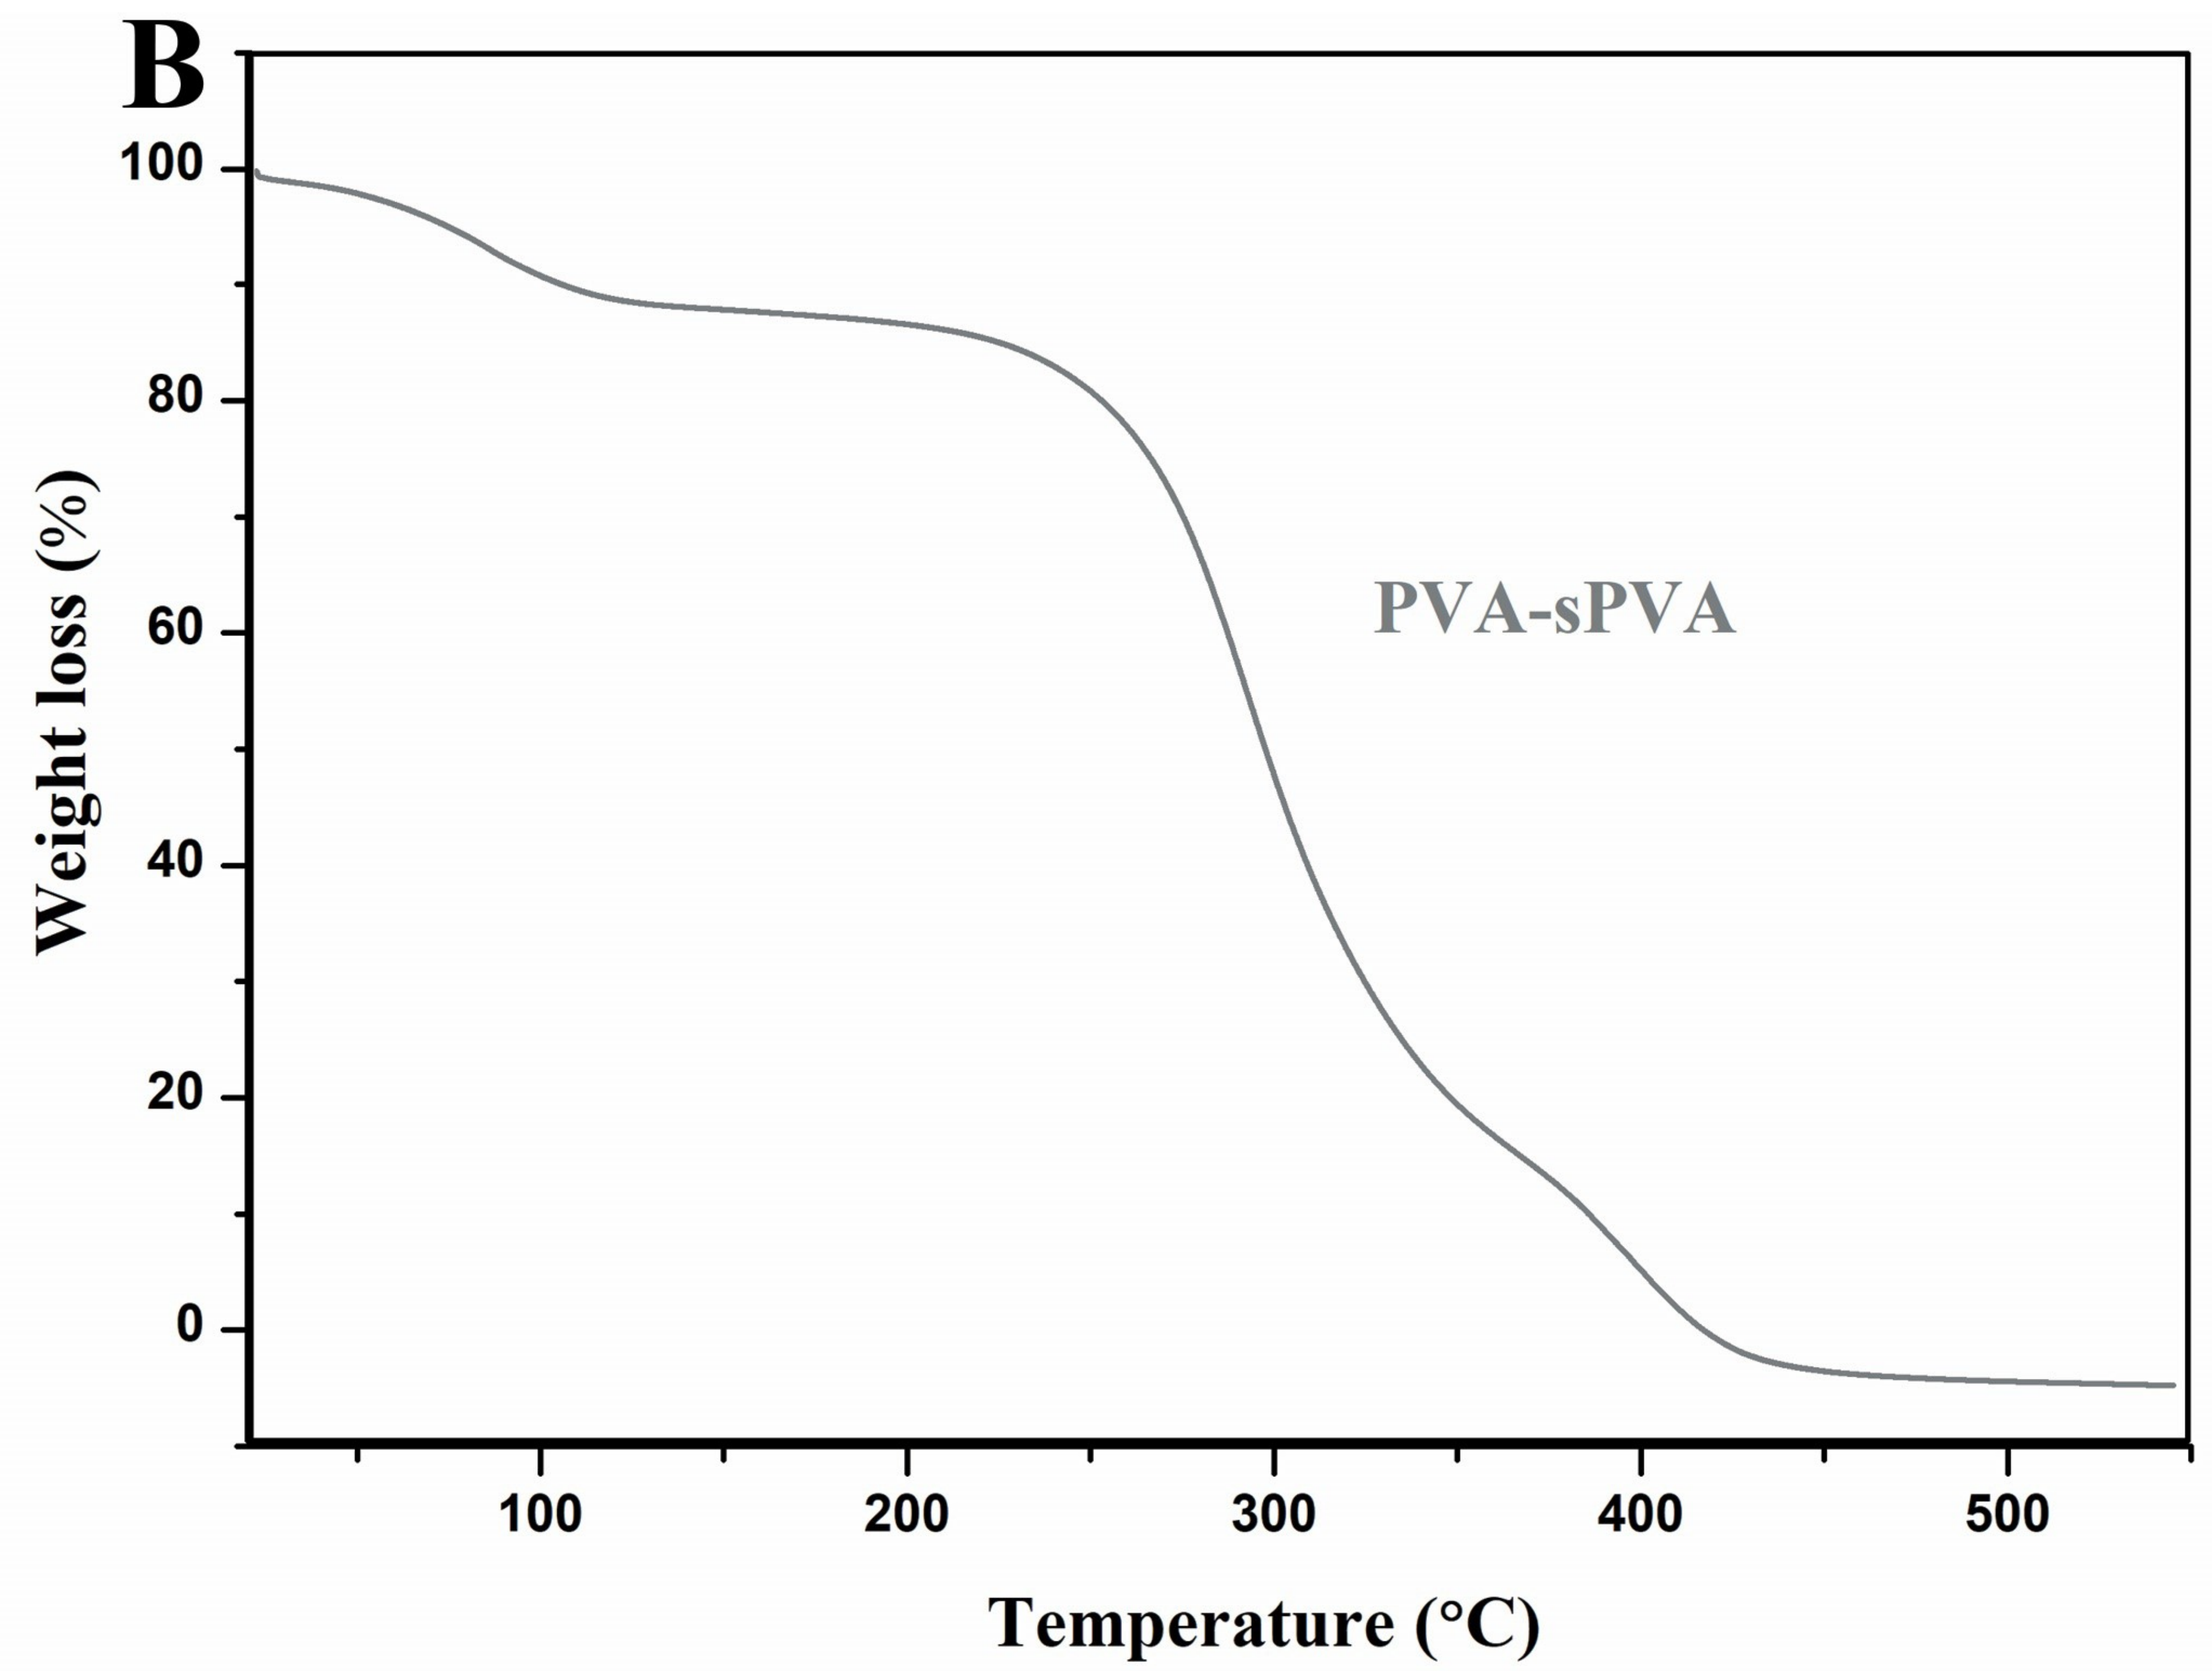

Supplement: d3nj04641a6.pdf [file d3nj04641a6.pdf]

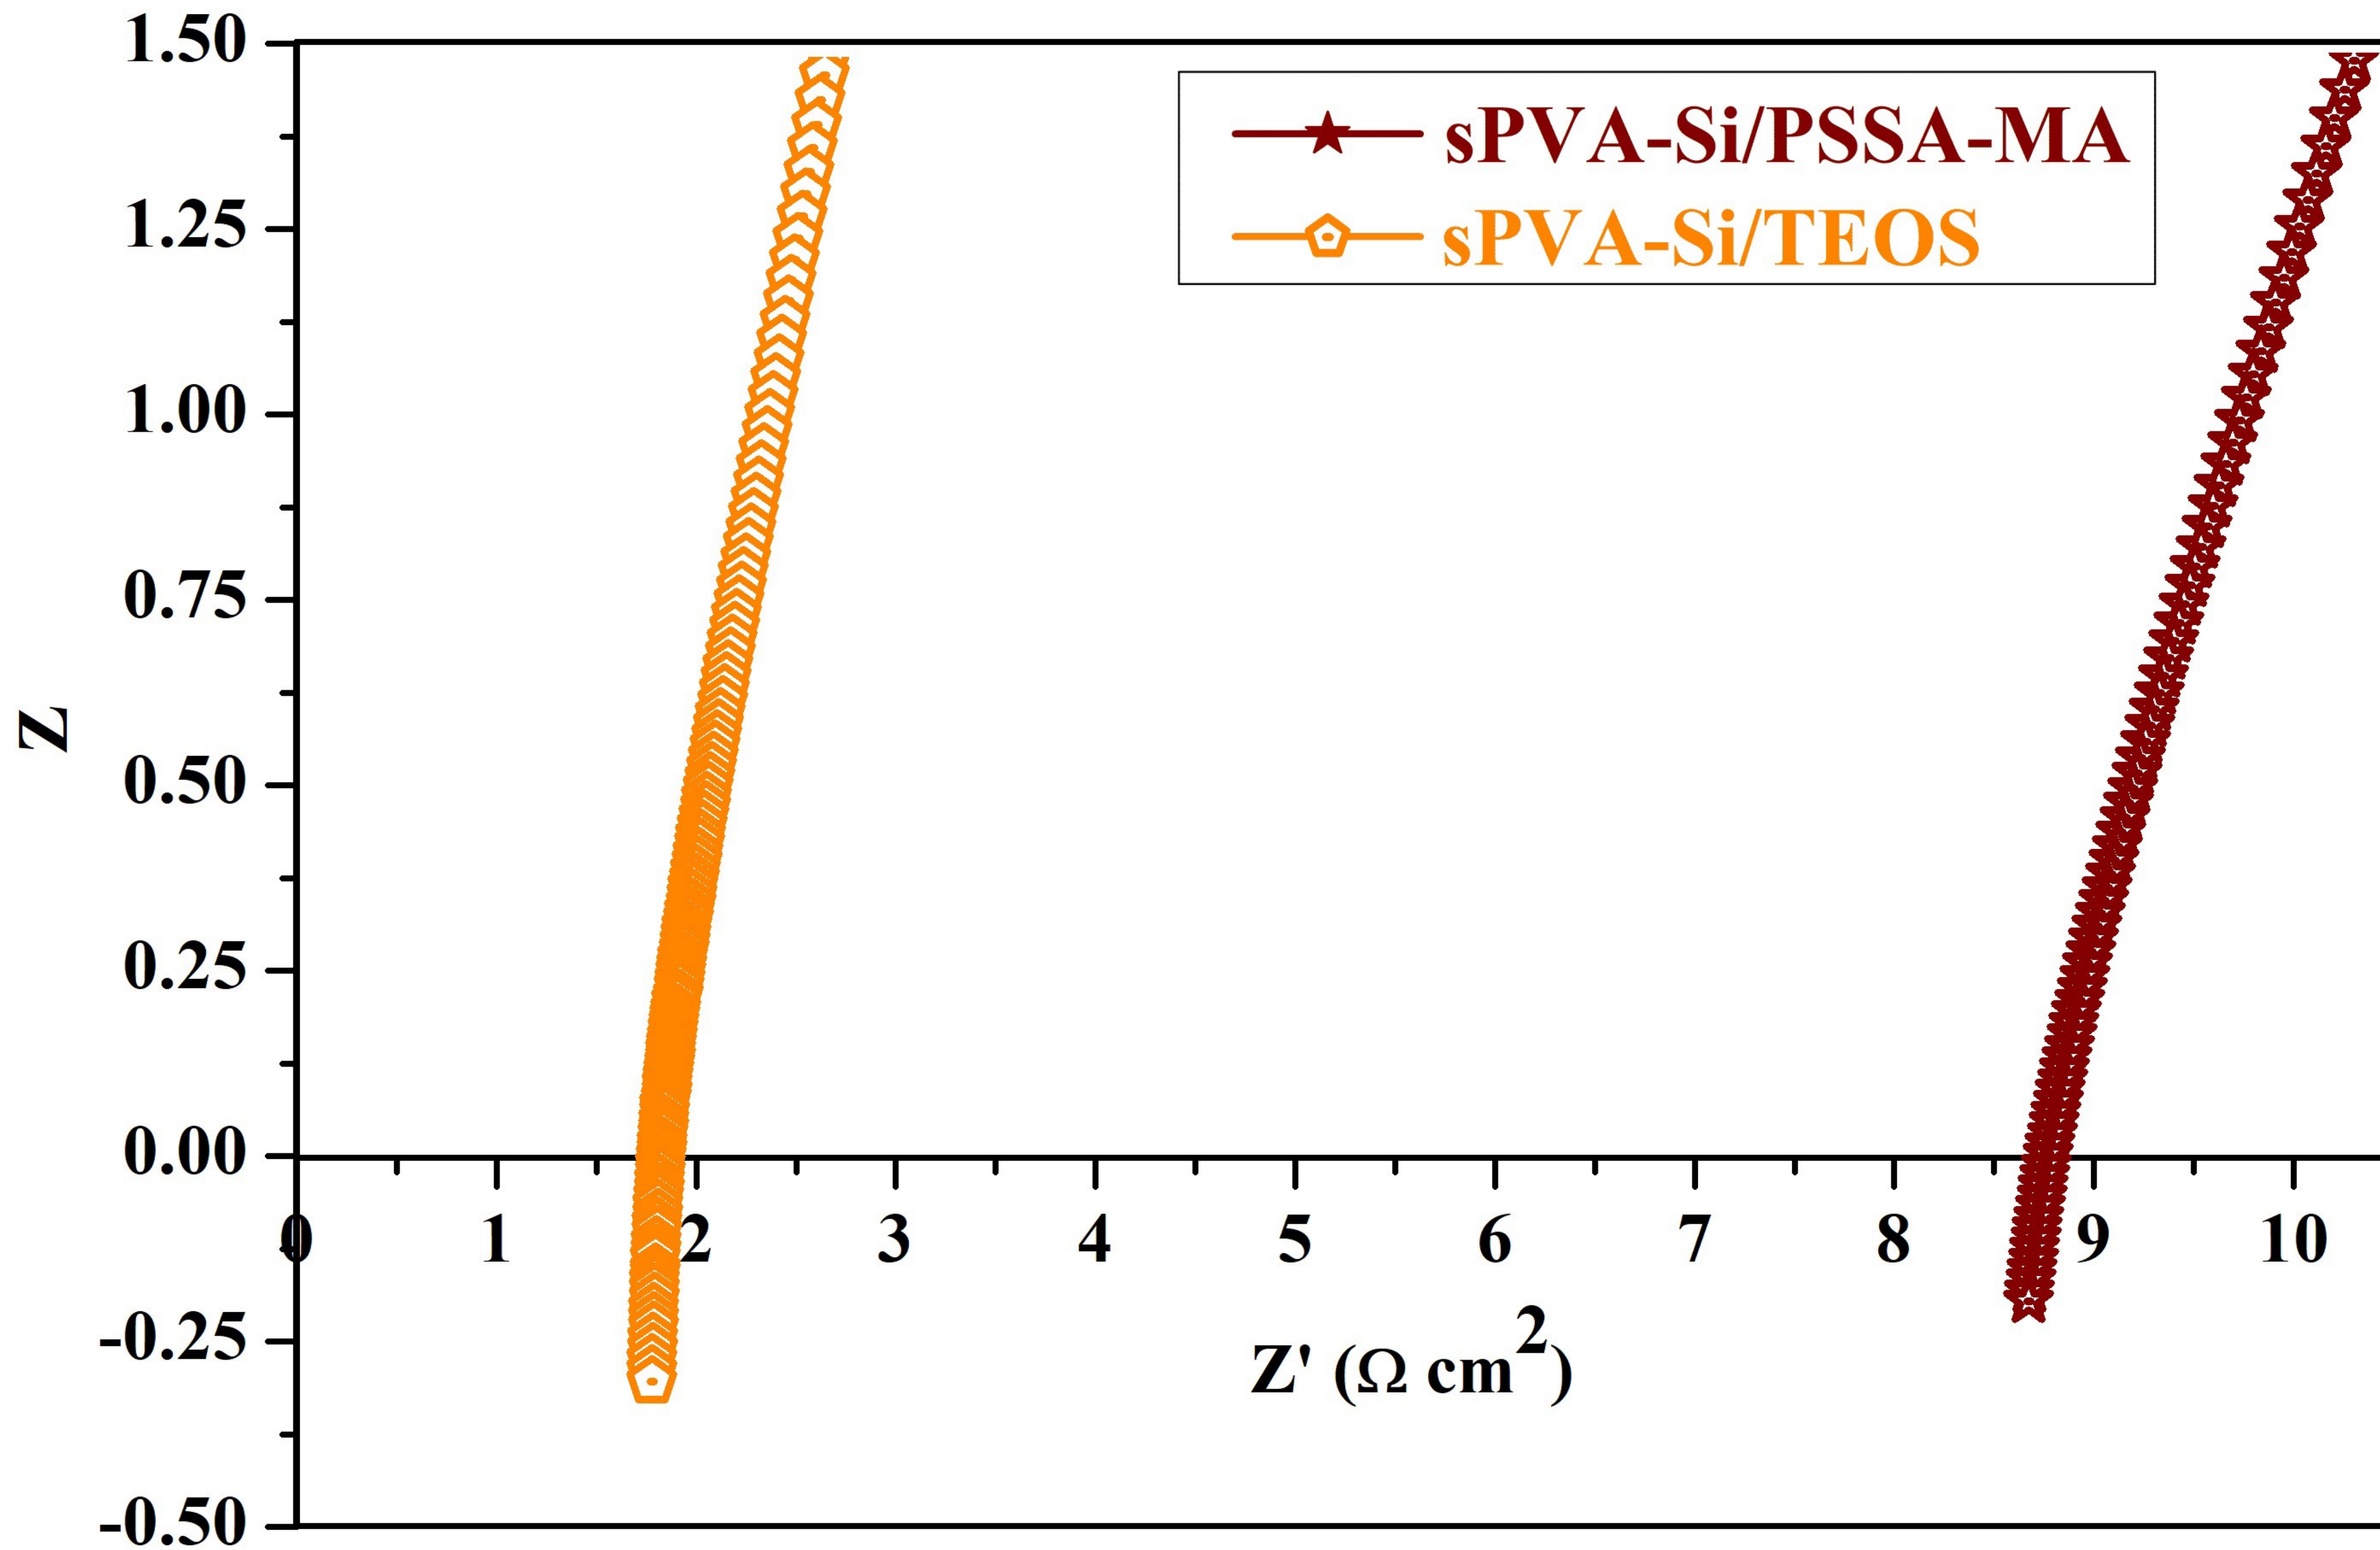

Supplement: d3nj04641a7.pdf [file d3nj04641a7.pdf]
